# Supplementary material for: Simultaneous tracing of carbon and nitrogen isotopes in human cells
Source: Royal Society of Chemistry journal article supplement (doi:10.1039/c6mb00009f), 2016-04-13
Supplement: c6mb00009f4.pdf [file c6mb00009f4.pdf]

**Figure S2**

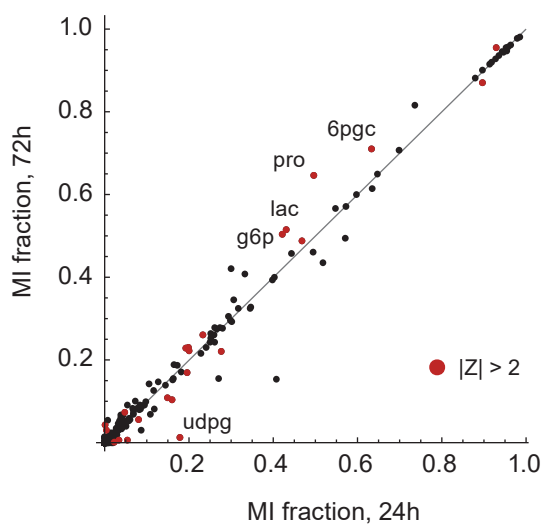

Mass isotopomer distributions at 24h vs 72h. MI fractions from labeled cultures at each time point averaged over three replicates are plotted. Values along line of equality (gray) indicate that steady-state is attained at 24h. Red color marks MI fractions that notably deviate from line of equality, by the criterion of absolute Z-score > 2. Highlighted metabolites are: 6pgc, 6-phosphogluconate; g6p, glucose-6-phosphate; lac, lactate; pro, proline; udpg, uracil diphosphate-glucose.
