# Supplementary material for: Simultaneous tracing of carbon and nitrogen isotopes in human cells
Source: Royal Society of Chemistry journal article supplement (doi:10.1039/c6mb00009f), 2016-04-13
Supplement: c6mb00009f6.pdf [file c6mb00009f6.pdf]

## Supporting information captions

**Figure S1. Measurement bias for mass isotopomer fractions.** Experimentally measured MI fractions of the  $^{13}\text{C}_1^{15}\text{N}_0$  isotopomer in monitored metabolites from unlabeled cultures (from naturally occurring  $^{13}\text{C}$ ) is plotted for three replicates. Solid lines mark the theoretical  $^{13}\text{C}_1^{15}\text{N}_0$  fraction.

**Figure S2. Mass isotopomer distributions at 24h vs 72h.** MI fractions from labeled cultures at each time point averaged over three replicates are plotted. Values along line of equality (gray) indicate that steady-state is attained at 24h. Red color marks MI fractions that notably deviate from line of equality, by the criterion of absolute Z-score  $> 2$ . Highlighted metabolites are: 6pgc, 6-phosphogluconate; g6p, glucose-6-phosphate; lac, lactate; pro, proline; udpg, uracil diphosphate-glucose.

**Figure S3. Mass isotopomer distributions at 24h.** All measured and fitted carbon-nitrogen MMIDs at 24h, shown as bar charts. MMIs are grouped by  $^{13}\text{C}$ , increasing left to right, while  $^{15}\text{C}$  is indicated by bar color within each group (where applicable). Error bars denote standard deviation of triplicates.

**Dataset S4. All measured carbon-nitrogen mass isotopomer distributions and fluxes.** Please see excel file for documentation.

**Dataset S5. Complete metabolic network model with atom mappings.** Please see excel file for documentation
